# Supplementary material for: Low-intensity electromagnetic fields induce human cryptochrome to modulate intracellular reactive oxygen species
Source: PLoS Biol. 2018 Oct 2;16(10):e2006229. doi: 10.1371/journal.pbio.2006229 (PMC6168118; doi:10.1371/journal.pbio.2006229)
Supplement: S7 Table — (XLSX) [file pbio.2006229.s016.xlsx]

## Sheet: FOXM1
Transcription factor	Sequence logo of the PWM	Sequence	Target gene	Putative transcription factor binding sites
FOXM1		[TGGAAA]	PHACTR2	204-209	951-956	1076-1081	1769-1774	1875-1880
		[TGCAAA]	BMS1	13-18	455-460
		[TGGAAA]	PDE4D	455-460	588-593
		[TGCAAA]	NR3C1	1015-1020
		[TGCAAA]	CUX2	155-160
		[TGCAAA]	CROT	258-263	826-831	1332-1337	1550-1555
		[TTCAAA]	BNIP3L	66-71	134-139	680-685	734-739	974-979	1070-1075
		[TGGAAA]	PVT1	126-131	497-502	1339-1344	1603-1608
		[TGCAAA]	DISC1	37-42	1885-1890
		[TTCAAA]	PHF8	1413-1418	2028-2033
		[TTCAAA]	MDH1B	25-30	486-491	617-622	865-870	921-926	977-982
		[TGGAAA]	ODF2L	57-62	467-472	528-533	802-807	1322-1327	1704-1709
		[TTCAAA]	CBFA2T2	1156-1161	1454-1459
		[TGGAAA]	PTPRK	1454-1459	1568-1573
		[TTCAAA]	HLAA	308-313	41-46
		[TTCAAA]	GOLGA8A	41-46	1306-1311
		[TTCAAA]	MGA	30-35	344-349	416-421	932-937
		[TGCAAA]	GPR20	1136-1141	1214-1219
		[TGCAAA]	DMTF1	781-786	257-262
		[TTCAAA]	PGAP1	257-262	359-364	621-626	643-648	1153-1158
		[TTCAAA]	GSG1	510-515	1067-1072	1728-1733	1857-1862	1899-1904
		[TGGAAA]	CELSR1	31-36	90-95	1024-1029
		[TGCAAA]	CTSZ	1509-1514	336-341
		[TGCAAA]	L2HGDH	336-341	622-627
		[TTCAAA]	MID1	81-86	1927-1932
		[TGGAAA]	PPP3R1	40816	724-729	974-979	1244-1249
		[TGGAAA]	NYNRIN	868-873	1280-1285
		[TTCAAA]	RREB1	145-150	360-365	1029-1034	1564-1569	1764-1769
		[TGCAAA]	PHF20L1	150-155	409-414	809-814	901-906	1249-1254	1522-1527
		[TGCAAA]	ZNF326	760-765	1559-1564	1746-1751
		[TGGAAA]	NFKBIZ	1277-1282	2139-2144	2183-2188
		[TGCAAA]	FRMD4A	77-82	238-243	341-346	726-731	1661-1666	1847-1852
		[TGCAAA]	FTX	713-718	1283-1288
		[TTCAAA]	PCDHGA12	105-110	2055-2060
		[TTCAAA]	LINC01004	349-354	683-688
		[TGGAAA]	KLF12	15-20	698-703
		[TTCAAA]	GOLGA8IP	698-703	457-462
		[TGGAAA]	CFLAR	457-462	1027-1032
		[TTCAAA]	LINC00265	266-271	354-359	899-904	1125-1130
		[TGGAAA]	AMZ1	1658-1663	1840-1845
		[TGGAAA]	HERC2	1840-1845	295-300
		[TTCAAA]	NAA35	295-300	1013-1018
		[TTCAAA]	PKN2	1013-1018	85-90
		[TGCAAA]	LINC00173	85-90	93-98	151-156	464-469	1512-1517	1744-1749	2091-2096
		[TGCAAA]	ZSCAN20	132-137	1581-1586	1779-1784
		[TTCAAA]	FHL2	805-810	1356-1361	1907-1912
		[TGGAAA]	ARHGAP24	179-184	461-466	592-597	2096-2101
		[TTCAAA]	VAC14	1300-1305	1897-1902
		[TTCAAA]	NBPF9	1897-1902	22-27
		[TGCAAA]	WTAP	22-27	184-189	638-643	1354-1359	1387-1392
		[TTCAAA]	SMG1	502-507	1278-1283	2022-2027	2184-2189
		[TGCAAA]	ATXN2L	314-319	337-342	1372-1377
		[TTCAAA]	NBPF12	702-707	1126-1131
		[TTCAAA]	CSRNP3	240-245	249-254	363-368	725-730	1383-1388	1502-1507	1560-1565
		[TGGAAA]	MTMR9LP	1479-1484	1602-1607	1700-1705
		[TGGAAA]	DOCK3	45-50	869-874
		[TGCAAA]	SLMAP	87-92	165-170
		[TGGAAA]	INADL	292-297	371-376
		[TGCAAA]	POGZ	184-189	832-837	953-958	1574-1579	1856-1861
		[TGCAAA]	FAM219A	146-151	294-299
		[TGCAAA]	LINC00999	573-578	603-608
		[TTCAAA]	MGEA5	1763-1768	64-69
		[TGGAAA]	NEBL	64-69	108-113	1534-1539	1587-1592	1763-1768	2119-2124
		[TGGAAA]	STARD13	480-485	1638-1643	1871-1876	2084-2089	2139-2144
		[TTCAAA]	PCID2	216-221	340-345	2139-2144	2181-2186
		[TTCAAA]	PCNXL4	434-439	963-968	1345-1350	1836-1841
		[TGCAAA]	AGAP11	640-645	1208-1213	1279-1284
		[TTCAAA]	C5orf58	1757-1762	1836-1841
		[TGCAAA]	RPS16P5	1439-1444	1494-1499	2003-2008
		[TGGAAA]	LINC00240	141-146	168-173	248-253	488-493	1136-1141	1169-1174
		[TGCAAA]	PDE7A	357-362	582-587
		[TGGAAA]	DDX17	264-269	946-951
		[TTCAAA]	ZNF248	946-951	667-672
		[TTCAAA]	NCK2	667-672	1240-1245
		[TTCAAA]	SENP7	87-92	540-545	766-771	1364-1369
		[TTCAAA]	TNKS1BP1	1501-1506	1934-1939
		[TGCAAA]	HECTD4	1482-1487
		[TGCAAA]	ANKRD36B	207-212
		[TTCAAA]	MCOLN3	40-45	2008-2013
		[TGGAAA]	LINC01349	39-44	2000-2005
		[TGCAAA]	ANKRD36	643-648	815-820	870-875
		[TGCAAA]	RNGTT	30-35	1588-1593	1704-1709
		[TGCAAA]	KLF17	869-874	48-53
		[TGCAAA]	DTNBP1	48-53	530-535	656-661	1604-1609
		[TTCAAA]	SMA4	200-205	563-568	605-610
		[TGCAAA]	PTGR1	164-169	343-348	360-365	1036-1041
		[TTCAAA]	CFAP44	30-35	492-497	510-515	819-824	1301-1306
		[TTCAAA]	SLC26A5	761-766	1209-1214	1434-1439	1825-1830
		[TTCAAA]	RBM33	295-300	504-509	600-605	1451-1456	1921-1926	1983-1988
		[TGCAAA]	LINC00665	1661-1666	1896-1901	2017-2022
		[TTCAAA]	KIAA1211	239-244	545-550	906-911	1055-1060	1738-1743
		[TTCAAA]	RAD51AS1	400-405	1347-1352	2106-2111
		[TGGAAA]	MALAT1	497-502	687-692
		[TGCAAA]	SLC25A51	102-107	738-743	1033-1038	1725-1730
		[TTCAAA]	ASAP1IT1	499-504	1187-1192	1743-1748
		[TTCAAA]	PRPF40A	728-733	1415-1420	1977-1982
		[TTCAAA]	NUTM2F	753-758	912-917	1032-1037	1161-1166	1458-1463	1893-1898	2027-2032
		[TGCAAA]	NBEAL1	853-858	1335-1340
		[TGGAAA]	SGOL2	1230-1235	1498-1503	1669-1674
		[TGGAAA]	XIST	839-844	1592-1597	1799-1804
		[TGCAAA]	AHSA2	53-58	1317-1322	1454-1459	1486-1491
		[TTCAAA]	MSTO1	752-757	1018-1023	1461-1466
		[TTCAAA]	LINC00597	869-874	995-1000	1129-1134	1212-1217	1627-1632	1898-1903
		[TGCAAA]	PFN1P2	849-854	1018-1023
		[TGGAAA]	FBXL17	1413-1418	71-76
		[TTCAAA]	RPL23AP32	71-76	1094-1099	1536-1541	2073-2078
		[TGGAAA]	SND1IT1	1194-1199	916-921
		[TGGAAA]	HYMAI	916-921	1471-1476	1496-1501	1540-1545	1915-1920
		[TGGAAA]	CECR2	985-990	1730-1735	2171-2176
		[TGCAAA]	EBLN2	111-116	471-476	833-838	1769-1774
		[TTCAAA]	BCOR	63-68	295-300	486-491
		[TTCAAA]	EID3	30-35	835-840	1568-1573
		[TGGAAA]	CATSPER2	16-21	512-517	1522-1527	1820-1825
		[TGCAAA]	KRTAP33	597-602	922-927	994-999	1082-1087	1206-1211	1529-1534
		[TTCAAA]	AGPAT4IT1	2188-2193	1208-1213
		[TGGAAA]	GHRLOS	1208-1213	1448-1453
		[TGGAAA]	FAM106A	668-673	1936-1941	2016-2021
		[TGGAAA]	RPS15AP10	191-196	319-324	1310-1315
		[TGCAAA]	RABGAP1L	41456	19-24	406-411	1427-1432	1579-1584
		[TTCAAA]	DPP9AS1	1199-1204	667-672
		[TGGAAA]	SCARNA4	667-672	832-837	2181-2186
		[TTCAAA]	TAS2R30	29-34	167-172	674-679	902-907	948-953	1255-1260	1275-1280
		[TGGAAA]	STAU2AS1	20-25	198-203	503-508	839-844	933-938	1342-1347	1693-1698
		[TGCAAA]	SNORD11	59-64	600-605
		[TGGAAA]	TAS2R43	455-460	501-506	547-552	847-852	867-872	1233-1238	2141-2146
		[TGGAAA]	TAS2R19	909-914	1224-1229	1259-1264	1648-1653	1994-1999	2057-2062
		[TTCAAA]	SNORA81	446-451	778-783	1297-1302
		[TGCAAA]	RNU4ATAC	91-96	804-809	1641-1646	1774-1779	2122-2127	2158-2163
		[TTCAAA]	SCARNA23	537-542	710-715
		[TGGAAA]	SNORA74B	1242-1247	1387-1392	1755-1760
		[TTCAAA]	SNORD11B	13-18	66-71	231-236	1793-1798
		[TTCAAA]	ANKFY1	1172-1177	719-724
		[TTCAAA]	CEP68	719-724	1264-1269
		[TGCAAA]	SLFN5	680-685	369-374
		[TGGAAA]	SNORD19	369-374	800-805	882-887	920-925
		[TGCAAA]	MIR181A1HG	82-87	529-534	813-818	846-851	1547-1552	1565-1570	1889-1894
		[TTCAAA]	NBPF10	657-662	449-454
		[TGCAAA]	NBPF15	449-454	234-239
		[TTCAAA]	RNF207	234-239	934-939	1210-1215
		[TTCAAA]	LINC01347	179-184	385-390	830-835	1178-1183
		[TGGAAA]	SNORD12C	354-359	1800-1805	1954-1959
		[TGCAAA]	MTRNR2L7	185-190	907-912
		[TTCAAA]	TTTY14	1712-1717	1759-1764
		[TTCAAA]	ARL17A	812-817	850-855	1849-1854	2087-2092
		[TGGAAA]	ANKRD20A9P	63-68	178-183	346-351	1095-1100	1199-1204	1919-1924
		[TGCAAA]	CGB7	279-284	876-881	1897-1902
		[TTCAAA]	LINC01000	314-319	1804-1809
		[TGGAAA]	WNK1	722-727	232-237
		[TGCAAA]	PIKFYVE	232-237	719-724	1602-1607
		[TGGAAA]	DENND1B	304-309	1401-1406	1677-1682
		[TGGAAA]	CCDC144A	2020-2025	1286-1291
		[TGCAAA]	SNORA6	1286-1291	1720-1725
		[TGGAAA]	EPS15	1192-1197	1558-1563
		[TTCAAA]	STK17B	1302-1307	1367-1372	2032-2037	2126-2131
		[TTCAAA]	KIDINS220	1369-1374	1574-1579	1812-1817
		[TGGAAA]	TLE4	476-481	1455-1460
		[TTCAAA]	SNX3	1455-1460	283-288
		[TTCAAA]	LINC00632	283-288	1767-1772	2133-2138
		[TGCAAA]	IDS	201-206	1403-1408	2189-2194
		[TTCAAA]	BACH2	819-824	1140-1145	1449-1454
		[TGGAAA]	STAG2	173-178	494-499	583-588	865-870	2052-2057
		[TTCAAA]	SNORD98	424-429	485-490	536-541	900-905	1310-1315	2108-2113
		[TGCAAA]	USP45	70-75	711-716	2003-2008
		[TGGAAA]	DOCK9	205-210	1651-1656
		[TTCAAA]	SMG7	55-60	1203-1208	1672-1677
		[TTCAAA]	SF1	375-380	496-501
		[TTCAAA]	SCAPER	565-570	1976-1981
		[TTCAAA]	C17orf104	1374-1379	458-463
		[TGGAAA]	ZMYM2	458-463	788-793
		[TGGAAA]	HERC2P10	890-895	1514-1519
		[TGCAAA]	TLE1	234-239	422-427
		[TGCAAA]	JPX	422-427	510-515	1519-1524	1684-1689	1784-1789
		[TGCAAA]	CCT3	571-576	873-878
		[TGGAAA]	SLC25A16	907-912	1537-1542
		[TTCAAA]	SCARNA9	1537-1542	1489-1494
		[TTCAAA]	ATXN2	1489-1494	1545-1550
		[TGCAAA]	CA5B	133-138	315-320
		[TGGAAA]	DNAH14	612-617	1084-1089	1090-1095	1700-1705
		[TGCAAA]	FAM160B1	1110-1115	1620-1625
		[TTCAAA]	TSIX	76-81	1193-1198	1643-1648	1715-1720
		[TGCAAA]	RABL2B	1676-1681	1769-1774
		[TTCAAA]	PRDX4	1440-1445	1547-1552	1743-1748
		[TGGAAA]	ZNF507	195-200	270-275
		[TGGAAA]	PSMD10	155-160	753-758
		[TGCAAA]	DBF4B	181-186	1444-1449	1503-1508	1755-1760	1798-1803
		[TGCAAA]	NAMPT	13-18	713-718	1155-1160
		[TGCAAA]	SNORD91B	801-806	1952-1957	2021-2026
		[TTCAAA]	SUN1	1862-1867	2088-2093
		[TGGAAA]	SNORD19B	1251-1256	1482-1487
		[TTCAAA]	SNORD63	58-63	2046-2051	2186-2191
		[TTCAAA]	ZNF75A	741-746	896-901	1408-1413	1551-1556
		[TGGAAA]	LOC100505912	359-364	60-65
		[TGCAAA]	LOC100507412	60-65	472-477
		[TTCAAA]	LOC100288069	261-266	520-525	1147-1152	1418-1423
		[TTCAAA]	LOC100240734	844-849	861-866	1198-1203	1511-1516
		[TGGAAA]	LOC100190986	967-972	664-669
		[TGGAAA]	LOC100128398	664-669	987-992	1219-1224	1479-1484	2139-2144
		[TGCAAA]	LOC100132356	243-248	481-486	522-527	612-617	818-823	958-963	1118-1123
		[TGCAAA]	LOC100131564	72-77	173-178	733-738
		[TGCAAA]	LOC284581	345-350
							1960-1967

## Sheet: FOXO1
Transcription factor	Sequence logo of the PWM	Sequence	Target gene	Putative transcription factor binding sites
FOXO1		[GTAAACAA]	PHACTR2	761-768	779-786	936-943
		[ATAAACAA]	CROT	520-527	1098-1105
		[ATAAACAA]	ODF2L	1844-1851	429-436
		[TTAAACAA]	PTPRK	429-436	1452-1459
		[ATAAACAA]	HLAA	1452-1459	834-841
		[GTAAACAA]	DMTF1	834-841	958-965
		[TTAAACAA]	PPP3R1	1178-1185	1558-1565
		[ATAAACAA]	NYNRIN	1558-1565	458-465
		[GTAAACAG]	RREB1	458-465	1768-1775
		[ATAAACAA]	PHF20L1	1768-1775	901-908
		[TTAAACAA]	GOLGA8IP	901-908	1619-1626
		[GTAAACAC]	CFLAR	1619-1626	68-75
		[ATAAACAA]	LINC00173	68-75	1493-1500
		[GTAAACAA]	FHL2	1493-1500	1842-1849
		[GTAAACAG]	INADL	1842-1849	1153-1160
		[TTAAACAA]	LINC00999	1153-1160	1282-1289
		[GTAAACAA]	STARD13	1282-1289	470-477
		[ATAAACAT]	PCNXL4	470-477	1255-1262
		[ATAAACAA]	AGAP11	1255-1262	987-994
		[ATAAACAA]	ZNF248	987-994	147-154
		[GTAAACAA]	HECTD4	147-154	313-320
		[GTAAACAA]	DTNBP1	313-320	171-178
		[TTAAACAA]	SMA4	171-178	1062-1069	2187-2194
		[CTAAACAA]	CFAP44	1899-1906	2155-2162
		[GTAAACAC]	SLC26A5	358-365	793-800
		[TTAAACAA]	KIAA1211	793-800	1208-1215
		[ATAAACAT]	NUTM2F	1208-1215	1399-1406
		[GTAAACAA]	SGOL2	987-994	1722-1729
		[ATAAACAT]	LINC00597	1463-1470	1634-1641
		[TTAAACAA]	PFN1P2	1189-1196	1455-1462
		[GTAAACAG]	FBXL17	1455-1462	1416-1423
		[ATAAACAA]	KRTAP33	1416-1423	1885-1892
		[ATAAACAT]	AGPAT4IT1	1993-2000	1918-1925
		[ATAAACAT]	GHRLOS	1918-1925	1187-1194
		[ATAAACAT]	TAS2R30	1187-1194	1131-1138
		[TTAAACAA]	TAS2R19	1131-1138	1630-1637
		[GTAAACAG]	RNU4ATAC	571-578	1033-1040
		[CTAAACAA]	SNORD11B	1033-1040	1599-1606
		[GTAAACAG]	CEP68	1599-1606	677-684
		[TTAAACAA]	RNF207	677-684	160-167
		[ATAAACAA]	WNK1	160-167	42-49
		[ATAAACAT]	EPS15	42-49	634-641
		[CTAAACAA]	FAM212A	634-641	1074-1081
		[CTAAACAA]	TLE4	1074-1081	961-968
		[GTAAACAC]	ZNF331	961-968	826-833
		[GTAAACAT]	DOCK9	826-833	1030-1037
		[CTAAACAA]	CCT3	237-244	236-243
		[ATAAACAT]	SCARNA9	236-243	1061-1068
		[CTAAACAA]	RABL2B	1229-1236	1378-1385
		[GTAAACAA]	PRDX4	1490-1497	1109-1116
		[ATAAACAT]	PSMD10	1109-1116	1115-1122
		[GTAAACAG]	DBF4B	1034-1041	70-77
		[ATAAACAA]	NAMPT	70-77	167-174
		[TTAAACAA]	SNORD38A	2180-2187	1165-1172
		[CTAAACAA]	SUN1	1165-1172	906-913
		[CTAAACAA]	LOC100505912	906-913	1389-1396
		[CTAAACAA]	LOC100190986	1711-1718	1299-1306
		[ATAAACAT]	LOC100129917	1299-1306	1295-1302
		[GTAAACAT]	LOC100131564	1295-1302	2117-2124
		[GTAAACAT]	LOC284581	2117-2124

## Sheet: HIF1A
Transcription factor	Sequence logo of the PWM	Sequence	Target gene	Putative transcription factor binding sites
HIF1A		[ACACGTGC]	ANKRD36BP2	1018-1025	1838-1845	1911-1918
		[GGACGTGG]	BMS1	302-309	1029-1036
		[GAACGTGA]	NR3C1	789-796	1805-1812
		[TCACGTGC]	CUX2	15-22	316-323	1479-1486
		[ACACGTGG]	BNIP3L	1632-1639	1282-1289
		[GCACGTGC]	DISC1	1282-1289	666-673
		[ACACGTGC]	MDH1B	666-673	1450-1457
		[ACACGTGG]	ODF2L	1118-1125	1179-1186
		[GGGCGTGC]	CBFA2T2	1911-1918	1381-1388
		[GTACGTGC]	GOLGA8A	1381-1388	486-493
		[GAACGTGT]	MGA	486-493	1914-1921
		[GAACGTGT]	PGAP1	934-941	1111-1118
		[CCACGTGG]	CTSZ	1111-1118	2153-2160
		[GGGCGTGC]	L2HGDH	2153-2160	2087-2094
		[AGACGTGA]	MID1	2087-2094	1813-1820
		[GAACGTGG]	PPP3R1	1813-1820	139-146
		[ATACGTGT]	NYNRIN	139-146	1536-1543	1960-1967
		[CGACGTGG]	RREB1	1247-1254	2148-2155
		[GAACGTGC]	ZNF326	359-366	1969-1976
		[GCACGTGA]	LINC01004	1969-1976	801-808
		[CAACGTGC]	KLF12	801-808	1763-1770
		[GGGCGTGC]	CFLAR	1763-1770	1773-1780
		[GCACGTGA]	LINC00265	1603-1610	1818-1825
		[GGGCGTGC]	AMZ1	1818-1825	1858-1865	2165-2172
		[AGACGTGT]	HERC2	276-283	2098-2105
		[CCACGTGT]	LINC00173	1327-1334	203-210
		[CTACGTGT]	FHL2	203-210	296-303
		[AAACGTGC]	VAC14	296-303	1514-1521
		[TTACGTGC]	WTAP	1514-1521	1569-1576
		[CGACGTGC]	ATXN2L	1569-1576	1262-1269
		[AGACGTGG]	MTMR9LP	1262-1269	1846-1853
		[AGACGTGG]	DOCK3	1846-1853	85-92
		[GCACGTGG]	NEBL	85-92	1086-1093
		[GAACGTGT]	PCNXL4	1440-1447	404-411
		[ACACGTGC]	SGSM2	404-411	1500-1507
		[TTACGTGC]	RPS16P5	1965-1972	882-889
		[GTACGTGT]	ZNF248	882-889	931-938	1931-1938
		[GTGCGTGC]	SENP7	1255-1262	1664-1671
		[GCACGTGG]	TNKS1BP1	1664-1671	1735-1742
		[CCACGTGA]	HECTD4	38-45	2066-2073
		[GCGCGTGC]	ANKRD36	2066-2073	1683-1690
		[GCACGTGC]	KLF17	1683-1690	387-394
		[CTACGTGA]	DTNBP1	387-394	1041-1048
		[AGACGTGT]	PTGR1	1041-1048	1804-1811
		[AGACGTGA]	CFAP44	1804-1811	1011-1018
		[CCACGTGT]	SLC26A5	1011-1018	786-793
		[GCGCGTGC]	RBM33	786-793	1665-1672
		[CCACGTGC]	LINC00665	2059-2066	790-797
		[AGACGTGA]	RAD51AS1	790-797	682-689
		[GGACGTGG]	MALAT1	682-689	1740-1747
		[CAACGTGC]	PHLDB3	440-447	684-691
		[GAACGTGA]	PRPF40A	684-691	281-288
		[GGACGTGG]	NUTM2F	281-288	1557-1564
		[ATACGTGT]	MSTO1	1557-1564	1616-1623
		[ATACGTGT]	PFN1P2	1798-1805	1812-1819	1829-1836
		[GGGCGTGC]	FBXL17	1817-1824	2192-2199
		[GGACGTGT]	HYMAI	2192-2199	1303-1310
		[CCACGTGT]	METTL21A	1303-1310	80-87
		[CCACGTGT]	GHRLOS	80-87	237-244
		[GAACGTGC]	FAM106A	237-244	587-594
		[GGACGTGG]	RPS15AP10	587-594	1916-1923
		[CGACGTGC]	RABGAP1L	1916-1923	1460-1467
		[ATACGTGC]	STAU2AS1	1460-1467	1087-1094
		[GCACGTGC]	SNORD11	1087-1094	910-917
		[GCACGTGT]	TAS2R43	910-917	1334-1341
		[GGACGTGC]	SCARNA23	1334-1341	1729-1736
		[ACACGTGG]	SNORA74B	1729-1736	222-229
		[ATACGTGT]	SNORD11B	222-229	1650-1657
		[GGACGTGG]	ANKFY1	1650-1657	2140-2147
		[GGACGTGC]	CEP68	2140-2147	2080-2087
		[GTACGTGC]	SNORD19	2080-2087	1218-1225
		[CAACGTGC]	NBPF15	1218-1225	1049-1056
		[TCACGTGC]	RNF207	1049-1056	76-83
		[CTACGTGC]	LINC01347	76-83	452-459
		[GCACGTGG]	TTTY14	1611-1618	130-137
		[GTGCGTGC]	ARL17A	130-137	351-358
		[CTACGTGC]	CGB7	351-358	957-964
		[GTACGTGG]	DENND1B	1838-1845	62-69
		[ATACGTGT]	CCDC144A	62-69	308-315
		[GCACGTGG]	SNORA6	523-530	644-651
		[CCACGTGT]	KIDINS220	644-651	809-816	1999-2006
		[GAACGTGC]	TLE4	168-175	1657-1664
		[ACACGTGG]	LINC00632	433-440	1157-1164
		[GGACGTGC]	IDS	1157-1164	999-1006
		[CCACGTGT]	BACH2	999-1006	1629-1636
		[GGGCGTGC]	ZNF331	2144-2151	798-805
		[CCACGTGT]	SMG7	798-805	42-49
		[GTACGTGG]	ZMYM2	42-49	1956-1963
		[TGACGTGC]	HERC2P10	531-538	874-881
		[GGGCGTGC]	TLE1	1736-1743	1671-1678
		[AGACGTGG]	EXOC7	1671-1678	1721-1728
		[GGACGTGC]	CA5B	1997-2004	630-637
		[ATACGTGT]	FAM160B1	630-637	90-97
		[GGGCGTGC]	RABL2B	90-97	472-479	844-851
		[GGACGTGG]	PRDX4	1738-1745	1882-1889	2018-2025
		[CGACGTGG]	ZNF507	1755-1762	2074-2081
		[CGACGTGA]	PSMD10	2074-2081	818-825
		[CTACGTGT]	NAMPT	818-825	1949-1956
		[GCACGTGT]	SNORD38A	20-27	902-909
		[GTACGTGC]	SNORD19B	582-589	2039-2046
		[GAACGTGT]	SNORD63	2039-2046	1735-1742
		[GAACGTGG]	LOC100505912	1735-1742	676-683
		[GCGCGTGC]	LOC100288069	676-683	1009-1016
		[GGGCGTGC]	LOC100240734	1009-1016	1307-1314
		[CGACGTGC]	LOC100128398	1656-1663	430-437
		[GAACGTGC]	LOC100129917	430-437	738-745	1413-1420
		[AGACGTGG]	LOC100131564	2081-2088

## Sheet: KLF4
Transcription factor	Sequence logo of the PWM	Sequence	Target gene	Putative transcription factor binding sites
KLF4		[TGAGAAA]	PHACTR2	711-717	1097-1103	1437-1443
		[TCAGAAA]	PDE4D	214-220	238-244
		[TCAGAAA]	CUX2	238-244	2108-2114
		[TCAGAAA]	CROT	766-772	1583-1589
		[TGAGAAA]	PHF8	1583-1589	1608-1614
		[TGAGAAA]	CBFA2T2	430-436	1023-1029
		[TGAGAAA]	PTPRK	1023-1029	2035-2041
		[TGAGAAA]	GOLGA8A	2035-2041	531-537
		[TCAGAAA]	MGA	531-537	1548-1554
		[TCAGAAA]	MID1	1548-1554	1774-1780
		[TCAGAAA]	PPP3R1	857-863	411-417
		[TCAGAAA]	RREB1	411-417	244-250
		[TCAGAAA]	PHF20L1	244-250	272-278	883-889
		[TGAGAAA]	ZNF326	396-402	26-32
		[TCAGAAA]	FRMD4A	26-32	1536-1542
		[TGAGAAA]	PCDHGA12	767-773	1602-1608
		[TGAGAAA]	LINC01004	1394-1400	2179-2185
		[TGAGAAA]	CFLAR	819-825	1239-1245
		[TGAGAAA]	AMZ1	1239-1245	759-765
		[TCAGAAA]	PKN2	759-765	1031-1037
		[TGAGAAA]	FHL2	1031-1037	2017-11-01
		[TGAGAAA]	VAC14	2017-11-01	2099-2105
		[TGAGAAA]	NBPF9	2099-2105	2140-2146
		[TGAGAAA]	SMG1	2017-09-03	1294-1300	1883-1889	2116-2122
		[TCAGAAA]	CSRNP3	445-451	1654-1660
		[TGAGAAA]	DOCK3	330-336	273-279
		[TGAGAAA]	SLMAP	273-279	607-613
		[TGAGAAA]	FAM219A	607-613	475-481
		[TGAGAAA]	LINC00999	475-481	987-993
		[TGAGAAA]	NEBL	194-200	1073-1079	1416-1422
		[TCAGAAA]	STARD13	1070-1076	538-544
		[TCAGAAA]	PCID2	538-544	879-885
		[TGAGAAA]	PCNXL4	879-885	2149-2155
		[TCAGAAA]	LINC00240	2149-2155	1313-1319
		[TGAGAAA]	ZNF248	1313-1319	45-51
		[TCAGAAA]	NCK2	45-51	132-138
		[TGAGAAA]	SENP7	624-630	103-109
		[TCAGAAA]	ANKRD36B	103-109	1356-1362
		[TCAGAAA]	LINC01349	480-486	2016-10-01
		[TGAGAAA]	RNGTT	2016-10-01	1815-1821
		[TGAGAAA]	KLF17	1815-1821	376-382
		[TGAGAAA]	DTNBP1	376-382	680-686
		[TGAGAAA]	PTGR1	680-686	15-21
		[TCAGAAA]	CFAP44	15-21	459-465
		[TCAGAAA]	RBM33	1157-1163	379-385
		[TCAGAAA]	LINC00665	379-385	829-835
		[TCAGAAA]	LINC00597	829-835	1760-1766
		[TCAGAAA]	FBXL17	1760-1766	275-281
		[TCAGAAA]	EBLN2	275-281	643-649
		[TGAGAAA]	CATSPER2	643-649	571-577
		[TCAGAAA]	AGPAT4IT1	571-577	570-576
		[TGAGAAA]	FAM106A	570-576	1499-1505
		[TCAGAAA]	RPS15AP10	1499-1505	1610-1616
		[TGAGAAA]	TAS2R30	1284-1290	1176-1182
		[TGAGAAA]	TAS2R19	1176-1182	1387-1393
		[TCAGAAA]	RNU4ATAC	1849-1855	169-175
		[TCAGAAA]	SCARNA23	169-175	955-961
		[TCAGAAA]	CEP68	147-153	1345-1351
		[TGAGAAA]	SNORD19	1345-1351	1650-1656
		[TCAGAAA]	LINC01347	792-798	916-922
		[TCAGAAA]	ARL17A	916-922	1847-1853
		[TCAGAAA]	ANKRD20A9P	1847-1853	1953-1959	2169-2175
		[TGAGAAA]	CGB7	42-48	1159-1165
		[TGAGAAA]	DENND1B	337-343	1630-1636
		[TGAGAAA]	SNORA6	1630-1636	531-537
		[TCAGAAA]	EPS15	531-537	722-728	1071-1077	2055-2061
		[TCAGAAA]	STK17B	315-321	1589-1595
		[TCAGAAA]	KIDINS220	494-500	1487-1493
		[TGAGAAA]	SNX3	1487-1493	1538-1544
		[TCAGAAA]	LINC00632	1538-1544	2057-2063
		[TGAGAAA]	IDS	1872-1878	407-413
		[TGAGAAA]	BACH2	407-413	481-487
		[TGAGAAA]	STAG2	2175-2181	983-989
		[TCAGAAA]	SNORD98	983-989	471-477
		[TGAGAAA]	ZNF331	471-477	995-1001
		[TGAGAAA]	DOCK9	995-1001	119-125
		[TCAGAAA]	SCAPER	119-125	269-275	1247-1253	1337-1343	1820-1826
		[TCAGAAA]	HERC2P10	845-851	339-345
		[TGAGAAA]	ZFAT	339-345	1684-1690
		[TGAGAAA]	SCARNA9	1684-1690	1847-1853
		[TGAGAAA]	FAM160B1	1847-1853	230-236
		[TGAGAAA]	TSIX	230-236	1031-1037
		[TCAGAAA]	PRDX4	1031-1037	105-111
		[TCAGAAA]	SNORD91B	105-111	152-158
		[TGAGAAA]	SNORD19B	152-158	2168-2174
		[TCAGAAA]	ZNF75A	2168-2174	347-353
		[TCAGAAA]	LOC100240734	347-353	335-341
		[TCAGAAA]	LOC284581	335-341	516-522

## Sheet: MYCN
Transcription factor	Sequence logo of the PWM	Sequence	Target gene	Putative transcription factor binding sites
MYCN		[CTAGAAGCTG]	PHACTR2	848-857	1652-1661
		[GGAGAAGCGC]	ANKRD36BP2	1652-1661	648-657
		[GTTTAAGCTG]	BMS1	648-657	869-878	1349-1358	1395-1404
		[GTTAAAGCAC]	PDE4D	636-645	694-703
		[GGGGAAGCTC]	NR3C1	694-703	741-750	964-973	1351-1360
		[GACGAAGCCC]	CUX2	1278-1287	329-338
		[TTTGAAGCCA]	CROT	329-338	2138-2147
		[GCAGAAGCTT]	BNIP3L	38-47	1110-1119	1222-1231	1734-1743
		[TTAGAAGCTG]	PVT1	47-56	136-145	518-527
		[ACTGAAGCCT]	DISC1	945-954	835-844
		[CTTAAAGCTT]	PHF8	835-844	1972-1981	2016-2025
		[GCAAAAGCGT]	MDH1B	922-931	934-943	1422-1431	1724-1733
		[CTATAAGCCT]	ODF2L	2017-12-03	367-376	970-979	1725-1734	2020-2029
		[GCAAAAGCCA]	CBFA2T2	1593-1602	1772-1781
		[GAAGAAGCTG]	PTPRK	1299-1308	1494-1503
		[CCAGAAGCTT]	HLAA	627-636	838-847	1155-1164	1559-1568	2000-2009	2033-2042
		[GGGGAAGCCA]	GOLGA8A	306-315	78-87
		[TGGGAAGCCT]	MGA	78-87	862-871
		[GAACAAGCCT]	GPR20	27-36	608-617	825-834	952-961	995-1004	1254-1263	2055-2064
		[GGTTAAGCAT]	PGAP1	486-495	385-394
		[GGAGAAGCCC]	CELSR1	385-394	622-631	1050-1059	1810-1819
		[AGAAAAGCTT]	CTSZ	344-353	581-590	794-803	1309-1318
		[AAAGAAGCCG]	L2HGDH	1629-1638	1589-1598
		[AGAGAAGCAC]	MID1	1589-1598	1915-1924
		[GCGGAAGCCC]	PPP3R1	1915-1924	197-206
		[GAGGAAGCCC]	NYNRIN	197-206	814-823
		[GTTCAAGCCT]	RREB1	743-752	1230-1239	1344-1353	1491-1500
		[ACTGAAGCTT]	PHF20L1	1139-1148	1182-1191
		[GAAGAAGCGC]	ZNF326	1020-1029	452-461
		[TGTTAAGCAT]	NFKBIZ	452-461	668-677	1498-1507
		[GCAAAAGCTA]	FRMD4A	78-87	543-552
		[GAAGAAGCAG]	FTX	1854-1863	928-937
		[AAAAAAGCTT]	PCDHGA12	928-937	1759-1768	2006-2015
		[TTTGAAGCCT]	LINC01004	546-555	1472-1481	1863-1872
		[GGTGAAGCGC]	KLF12	762-771	1811-1820
		[CCAAAAGCTT]	GOLGA8IP	1362-1371	1646-1655	1747-1756	1762-1771
		[GTTAAAGCTC]	CFLAR	1182-1191
		10	LINC00265	244-253
		[GCTTAAGCTC]	AMZ1	1025-1034	1202-1211
		[GTACAAGCCT]	NAA35	1202-1211	1569-1578
		[CCCGAAGCTC]	PKN2	1569-1578	1724-1733	2126-2135	2180-2189
		[GGAGAAGCAG]	LINC00173	299-308	839-848	892-901	1013-1022
		[GTTAAAGCTA]	ZSCAN20	542-551	963-972	1768-1777	2164-2173
		[GTAGAAGCAA]	ARHGAP24	1618-1627	1903-1912
		[AATAAAGCTG]	VAC14	575-584	1940-1949
		[GATTAAGCCT]	NBPF9	1940-1949	185-194
		[TCAAAAGCTC]	WTAP	185-194	1479-1488	1937-1946
		[GCAGAAGCGG]	SNX29	2008-2017	407-416
		[AGAGAAGCCT]	SMG1	407-416	621-630	670-679	956-965	1150-1159	1374-1383
		[GGACAAGCTG]	ATXN2L	765-774	1206-1215
		[GCTCAAGCCT]	NBPF12	97-106	396-405
		[GAGGAAGCTC]	CSRNP3	1063-1072	1250-1259
		[CGAGAAGCAG]	MTMR9LP	1250-1259	1553-1562	1670-1679	1676-1685
		[AATGAAGCTC]	DOCK3	1079-1088	1523-1532	1744-1753
		[TTTGAAGCTT]	SLMAP	669-678	1330-1339	1903-1912
		[TCAAAAGCCT]	INADL	1220-1229	1436-1445	2079-2088
		[ACAGAAGCCC]	FAM219A	82-91	1549-1558
		[TTTAAAGCTG]	LINC00999	511-520	847-856	1847-1856
		[CGAAAAGCAT]	MGEA5	727-736	1156-1165	1910-1919	2024-2033
		[GTGAAAGCTT]	NEBL	1938-1947	1463-1472
		[CATAAAGCTT]	STARD13	1463-1472	155-164
		[TCTGAAGCTC]	PCNXL4	155-164	572-581	1070-1079
		[TCTTAAGCTG]	AGAP11	918-927	1075-1084	2138-2147
		[CTTGAAGCAG]	SGSM2	108-117	489-498	740-749	1212-1221	1228-1237	1431-1440
		[AATGAAGCCA]	C5orf58	182-191	1154-1163	1837-1846	1978-1987
		[TTAAAAGCCT]	RPS16P5	885-894	978-987	1661-1670	2042-2051
		[GGTGAAGCTG]	LINC00240	1065-1074	2071-2080
		[ATAGAAGCAT]	PDE7A	1384-1393	1560-1569	1941-1950
		[ACAGAAGCTT]	DDX17	522-531	1537-1546	1936-1945	2132-2141
		[TGTAAAGCTA]	NCK2	360-369	216-225
		[TTTGAAGCTA]	SENP7	216-225	123-132
		[CAAGAAGCTG]	TNKS1BP1	123-132	424-433	863-872	1936-1945
		[AGAGAAGCAT]	ANKRD36B	51-60	787-796	1725-1734	1936-1945
		[CTACAAGCTT]	MCOLN3	85-94	491-500	1961-1970
		[CATCAAGCTT]	LINC01349	88-97	493-502	725-734	1832-1841	2106-2115
		[AGTTAAGCTT]	ANKRD36	415-424	467-476	764-773	1813-1822
		[TATGAAGCTT]	RNGTT	609-618	1467-1476
		[AGTTAAGCTG]	KLF17	1953-1962	1789-1798
		[GTAAAAGCCA]	DTNBP1	1789-1798	380-389
		[GCTGAAGCTC]	SMA4	380-389	260-269
		[AGAGAAGCAG]	PTGR1	260-269	515-524	1498-1507	1695-1704
		[AGAGAAGCAG]	CFAP44	1025-1034	1067-1076	1616-1625	1877-1886
		[GCAGAAGCCT]	SLC26A5	950-959	19-28
		[ATTGAAGCAC]	TRIP12	19-28	140-149
		[GCGGAAGCAC]	RBM33	1709-1718	1896-1905
		[TCTGAAGCTT]	LINC00665	356-365	428-437	1975-1984
		[GGATAAGCAT]	KIAA1211	188-197	188-197
		[GCTCAAGCCT]	MALAT1	188-197	527-536	2066-2075	2081-2090
		[AAAGAAGCTG]	PHLDB3	834-843	126-135
		[GCTAAAGCAC]	SLC25A51	126-135	265-274	1048-1057	2007-2016
		[GTGGAAGCCT]	ASAP1IT1	975-984	1692-1701	1837-1846
		[TATGAAGCCT]	PRPF40A	285-294	1368-1377	1422-1431	1554-1563	1665-1674	1725-1734
		[GGGGAAGCTG]	AGAP9	512-521	772-781
		[GTAGAAGCTT]	NUTM2F	1656-1665	1978-1987
		[GGAAAAGCAT]	NBEAL1	544-553	1421-1430
		[TTTGAAGCTG]	SGOL2	730-739	864-873	1282-1291	1759-1768
		[TGTTAAGCAT]	XIST	672-681	2061-2070
		[CTAGAAGCCG]	AHSA2	1330-1339	90-99
		[GCTGAAGCGA]	MSTO1	90-99	1887-1896
		[GGAGAAGCTT]	PFN1P2	1208-1217	869-878
		[TCTGAAGCAA]	FBXL17	869-878	997-1006	1345-1354
		[TATGAAGCAT]	RPL23AP32	228-237	1389-1398	1497-1506	1880-1889	2161-2170	2167-2176
		[CCACAAGCTT]	SND1IT1	1325-1334	759-768
		[ATTGAAGCAC]	HYMAI	759-768	908-917	1786-1795
		[TTTCAAGCTT]	CECR2	707-716	1837-1846	2108-2117
		[TTTGAAGCCC]	BCOR	508-517	852-861	1417-1426	1764-1773	1873-1882
		[TGAGAAGCCA]	EID3	348-357	686-695	1200-1209	2099-2108
		[CAAGAAGCAG]	CATSPER2	893-902	203-212
		[GATGAAGCTC]	KRTAP33	203-212	413-422	749-758	1530-1539	1741-1750	1901-1910	1979-1988
		[GGTGAAGCCC]	METTL21A	463-472	1001-1010
		[CCTTAAGCCC]	AGPAT4IT1	223-232	1604-1613	1938-1947	2119-2128
		[AGTGAAGCCT]	GHRLOS	392-401	767-776	1168-1177	1412-1421	1669-1678	1934-1943
		[GGAAAAGCCT]	FAM106A	603-612	1176-1185	1326-1335
		[AATGAAGCCA]	RABGAP1L	2015-06-01	95-104	538-547	1216-1225
		[GCCGAAGCCC]	DPP9AS1	1722-1731	1761-1770	1805-1814	1907-1916	1930-1939	2009-2018
		[GTTAAAGCAT]	SCARNA4	764-773	1289-1298	1387-1396	1656-1665
		[GATCAAGCTC]	TAS2R30	1523-1532	686-695
		[GTTGAAGCTG]	STAU2AS1	686-695	1419-1428	1615-1624
		[GTTGAAGCAG]	SNORD11	128-137	1560-1569
		[GATGAAGCCA]	TAS2R43	1560-1569	1609-1618	1883-1892
		[ACTGAAGCAA]	TAS2R19	979-988	305-314
		[GCTCAAGCTC]	SNORA81	305-314	820-829	1075-1084	1311-1320	1522-1531
		[GTAAAAGCTT]	RNU4ATAC	550-559	1081-1090
		[ACTTAAGCTC]	SCARNA23	1199-1208	1791-1800
		[ACTTAAGCCT]	SNORA74B	1791-1800	1883-1892
		[GTTGAAGCAG]	SNORD11B	1862-1871	114-123
		[CTAAAAGCCT]	ANKFY1	114-123	999-1008
		[GTTGAAGCCA]	CEP68	999-1008	1111-1120	1132-1141	1224-1233	1482-1491	1800-1809
		[GCTTAAGCTG]	SLFN5	282-291	57-66
		[CAAGAAGCCT]	SNORD19	57-66	532-541	923-932	1115-1124	1838-1847	1936-1945
		[GTGGAAGCTC]	MIR181A1HG	304-313	1321-1330	2074-2083	2144-2153
		[AGAGAAGCCA]	BMS1P6	2017-11-02	552-561	812-821
		[GGTCAAGCCA]	NBPF10	1761-1770	2142-2151
		[CCAGAAGCTC]	NBPF15	1000-1009	484-493
		[GCAAAAGCAT]	LINC01347	484-493	811-820	880-889
		[GATCAAGCTG]	SNORD12C	208-217	631-640	1459-1468	1485-1494	1955-1964	1983-1992
		[TAAGAAGCAT]	MTRNR2L7	699-708	1669-1678
		[GTTCAAGCCC]	ARL17A	33-42	400-409	2004-2013
		[CTAGAAGCCT]	ANKRD20A9P	702-711	1178-1187	1328-1337	1671-1680
		[GTGGAAGCCG]	CGB7	710-719	1682-1691
		[GTCGAAGCTA]	LINC01000	213-222	1997-2006
		[GCAAAAGCCC]	WNK1	1575-1584	1827-1836
		[AGTGAAGCAG]	PIKFYVE	370-379	1023-1032	1817-1826	1988-1997	2094-2103
		[CTAAAAGCTC]	DENND1B	79-88	1954-1963
		[ATTAAAGCCT]	CCDC144A	623-632	695-704	1598-1607
		[GAAAAAGCCC]	SNORA6	217-226	1499-1508	1816-1825	2009-2018
		[CCTCAAGCTT]	EPS15	227-236	1082-1091	1210-1219
		[TGATAAGCTG]	STK17B	352-361	370-379	553-562	2093-2102
		[GAATAAGCTT]	KIDINS220	1794-1803	2177-2186
		[GGCGAAGCTC]	TLE4	1561-1570	1857-1866
		[GCTAAAGCCG]	SNX3	1857-1866	2154-2163
		[CCAAAAGCTC]	LINC00632	1736-1745	88-97
		[TGTGAAGCCT]	IDS	88-97	941-950
		[GAAAAAGCTC]	BACH2	151-160	577-586	1312-1321
		[GTGAAAGCTT]	STAG2	450-459	2159-2168
		[TTAAAAGCTC]	SNORD98	2014-05-01	1278-1287	1297-1306	1727-1736
		[CTTAAAGCAT]	USP45	879-888	1689-1698	2117-2126
		[TTTTAAGCTT]	ZNF331	1101-1110	1696-1705	1867-1876	2058-2067
		[TGAGAAGCTG]	DOCK9	1427-1436	1204-1213
		[GGAAAAGCCC]	SMG7	1204-1213	1843-1852
		[GCAGAAGCTG]	SF1	46-55	276-285	798-807	1810-1819
		[TAAGAAGCAG]	SCAPER	1863-1872	2070-2079	2106-2115
		[TCTGAAGCTA]	C17orf104	1549-1558	1627-1636	1813-1822
		[GCTGAAGCTA]	ZMYM2	128-137	380-389	2073-2082
		[GGAGAAGCAT]	HERC2P10	1342-1351	1755-1764
		[CCAAAAGCCC]	TLE1	475-484	1187-1196	1498-1507	2191-2200
		[AGAGAAGCCC]	EXOC7	1560-1569	1065-1074
		[TTAGAAGCTA]	ZFAT	1065-1074	237-246
		[GTTTAAGCTT]	JPX	237-246	550-559	556-565
		[GGGGAAGCAG]	CCT3	599-608	1742-1751
		[CGAGAAGCCG]	SLC25A16	428-437	291-300
		[TATGAAGCAG]	SCARNA9	291-300	317-326	1486-1495	1546-1555	1797-1806	1881-1890	1969-1978
		[CATTAAGCTC]	CA5B	362-371	753-762	1606-1615
		[GATGAAGCTG]	DNAH14	191-200	863-872	1282-1291
		[GTTGAAGCAG]	FAM160B1	128-137	275-284	2170-2179
		[CAAGAAGCCT]	TSIX	141-150	1853-1862
		[GTGAAAGCTT]	RABL2B	443-452	514-523	942-951	1264-1273	1404-1413
		[GGCGAAGCTT]	PRDX4	694-703	1633-1642	1995-2004
		[CGAAAAGCCT]	ZNF507	433-442	1647-1656
		[GGTGAAGCTC]	PSMD10	2030-2039	2172-2181
		[GTATAAGCTT]	DBF4B	363-372	1251-1260	1307-1316	2060-2069
		[CTTAAAGCAT]	DENND3	2017-10-01	1283-1292
		[GGAAAAGCAT]	SNORD91B	215-224	452-461	883-892	1878-1887	2040-2049
		[GGGGAAGCCA]	SNORD38A	71-80	161-170	575-584	1355-1364
		[GGAAAAGCCT]	SUN1	148-157	163-172	256-265
		[ATTGAAGCCT]	SNORD19B	340-349	438-447	1015-1024
		[TTTAAAGCCT]	ZNF75A	863-872	1148-1157
		[CTAGAAGCAA]	LOC100505912	234-243	1657-1666	1986-1995
		[GCAAAAGCAG]	LOC100507412	61-70	634-643
		[AGAAAAGCTC]	LOC100288069	874-883	1454-1463	1776-1785	1817-1826
		[CTAAAAGCTG]	LOC100240734	142-151	1086-1095	1578-1587	1776-1785
		[GGTCAAGCTG]	LOC100190986	362-371	1532-1541
		[GCATAAGCTG]	LOC100128398	656-665	1403-1412	1480-1489	2068-2077
		[GAAGAAGCCT]	LOC100132356	629-638	835-844	1355-1364	1865-1874
		[GGTGAAGCAT]	LOC100129917	103-112	2104-2113
		[GTAGAAGCCG]	LOC100131564	93-102	609-618	641-650	1405-1414	1478-1487
		[GGAAAAGCTA]	LOC284581	146-155	1120-1129	1338-1347

## Sheet: NFE2L2
Transcription factor	Sequence logo of the PWM	Sequence	Target gene	Putative transcription factor binding sites
NFE2L2		[GTGACTCAGCC]	GPR20	98-108	1255-1265
		[ATGACACAGCA]	RREB1	1255-1265	217-227
		[GTGATTCAGCA]	PHF20L1	217-227	1326-1336
		[TTGACTCAGCA]	ARHGAP24	1326-1336	356-366
		[GTGACAGAGCA]	NBPF12	356-366	673-683
		[GTGACCCAGCA]	PCID2	673-683	1241-1251
		[GTGACAGAGCA]	PTGR1	1241-1251	2056-2066
		[ATGACTGAGCA]	SNORD63	2056-2066

## Sheet: RORA
Transcription factor	Sequence logo of the PWM	Sequence	Target gene	Putative transcription factor binding sites
RORA		[CTCAAGGTCA]	PVT1	102-111	1221-1230
		[AATTAGGTCA]	PCDHGA12	1221-1230	99-108
		[GTCAAGGTCA]	LINC00265	99-108	1316-1325
		[ATTTAGGTCA]	ATXN2L	1316-1325	423-432
		[CTCAAGGTCA]	PCID2	423-432	772-781
		[TTAAAGGTCA]	RPS16P5	72-81	1084-1093
		[AACTAGGTCA]	PDE7A	1084-1093	2023-2032
		[TTATAGGTCA]	PRPF40A	2023-2032	751-760
		[AACAAGGTCA]	AGAP9	751-760	1921-1930
		[TTTAAGGTCA]	TAS2R30	1921-1930	1510-1519
		[TTTAAGGTCA]	TAS2R43	1510-1519	838-847
		[ATTGAGGTCA]	SNORA81	838-847	70-79
		[ACCAAGGTCA]	SCARNA23	70-79	1666-1675
		[TACTAGGTCA]	SNORD11B	1666-1675	791-800
		[AACAAGGTCA]	BMS1P6	791-800	864-873
		[AGCTAGGTCA]	SMG7	864-873	1352-1361
		[AAAAAGGTCA]	C17orf104	1352-1361	1137-1146
		[ATATAGGTCA]	SLC25A16	1137-1146	1494-1503
		[ATGAAGGTCA]	ATXN2	1494-1503	162-171
		[AACAAGGTCA]	DNAH14	162-171

## Sheet: STAT3
Transcription factor	Sequence logo of the PWM	Sequence	Target gene	Putative transcription factor binding sites
STAT3		[TTTCTGGAAAA]	PVT1	122-132	1802-1812
		[TTACTGGGAAA]	PTPRK	526-536	604-614
		[CTTCCAGGAAG]	GPR20	604-614	102-112
		[CTACTGGGAAG]	CELSR1	102-112	1048-1058
		[CTTCCGGGAAT]	CTSZ	1048-1058	1805-1815
		[CTGCTGGGAAT]	MID1	1805-1815	1092-1102
		[TTTCTGGGAAG]	PPP3R1	1092-1102	371-381
		[TTTCTAGGAAG]	NYNRIN	371-381	2180-2190
		[GTTCTGGGAAG]	AMZ1	2180-2190	1803-1813
		[TTTCCGGGAAC]	NAA35	1803-1813	1937-1947
		[CTTCTGGGAAT]	ZSCAN20	1937-1947	2173-2183
		[CTCCTGGGAAA]	WTAP	2173-2183	1392-1402
		[CTCCTGGGAAA]	MTMR9LP	1392-1402	254-264
		[CTTCTTGGAAC]	DOCK3	254-264	321-331
		[TTTCCGGGAAG]	SLMAP	321-331	981-991
		[CTGCTAGGAAA]	DDX17	981-991	1738-1748
		[CTGCTTGGAAA]	ASAP1IT1	1738-1748	1591-1601
		[TTTCTTGGAAC]	PRPF40A	1591-1601	321-331
		[GTTCTAGGAAT]	NUTM2F	321-331	1232-1242
		[TTTCTGGGAAT]	GHRLOS	960-970	858-868
		[CTTCTGGGAAC]	TAS2R30	858-868	411-421
		[CTTCTGGGAAC]	TAS2R43	411-421	865-875
		[CTTCTGGGAAC]	TAS2R19	865-875	1254-1264	2052-2062
		[TTTCCTGGAAT]	NBPF10	842-852	1806-1816
		[CTTCCAGGAAG]	PIKFYVE	1806-1816	1537-1547
		[CTTCCGGGAAA]	BACH2	1537-1547	1064-1074
		[ATGCTGGGAAA]	ZNF331	1064-1074	1913-1923	2022-2032
		[ATTCTTGGAAG]	SMG7	273-283	1007-1017
		[CTTCTGGGAAC]	ZFAT	1007-1017	1585-1595
		[TTTCCAGGAAA]	SCARNA9	1585-1595	2139-2149
		[CTTCCAGGAAG]	DNAH14	2139-2149	274-284
		[CTGCTTGGAAG]	DBF4B	274-284	1804-1814
		[TTTCTTGGAAT]	NAMPT	1192-1202	134-144
		[GTGCTGGGAAG]	SUN1	134-144

## Sheet: TFAP2A
Transcription factor	Sequence logo of the PWM	Sequence	Target gene	Putative transcription factor binding sites
TFAP2A		[TTTGGAAAGC]	PHACTR2	1767-1776	681-690
		[TTCTGAAAGC]	CELSR1	681-690	1560-1569
		[TTTAGAAAGC]	CTSZ	1560-1569	489-498
		[TTCCGAAAAC]	RREB1	489-498	1440-1449
		[TTTCGAAAAC]	FRMD4A	1440-1449	1659-1668
		[TTTAGAAAGC]	FTX	850-859	1742-1751
		[TTTGGAAAGC]	LINC00173	1742-1751	478-487
		[TCTGGAAAGC]	STARD13	478-487	2084-2093
		[TTCGGAAATC]	AGAP11	2084-2093	885-894
		[TTGGGAAACC]	NCK2	885-894	980-989
		[TTCTGAAAGC]	SMA4	980-989	508-517
		[TTTGGAAAAC]	CFAP44	508-517	1299-1308	1630-1639
		[TCTGGAAAGC]	RPS15AP10	189-198	931-940
		[TCTGGAAAGC]	STAU2AS1	931-940	1961-1970
		[TGCCGAAAGC]	CEP68	1961-1970	1675-1684
		[TGTGGAAAAC]	DENND1B	1675-1684	612-621
		[TTCTGAAAGC]	FAM212A	612-621	1089-1098
		[TTTTGAAAGC]	STK17B	1089-1098	1765-1774
		[TCTGGAAATC]	LINC00632	1765-1774	1499-1508
		[TCCCGAAAGC]	ZMYM2	1499-1508	871-880
		[TTTGGAAAAC]	CCT3	871-880	537-546
		[TTTAGAAAGC]	SCARNA9	537-546	1265-1274
		[TTAGGAAAGC]	CA5B	1265-1274	1501-1510
		[TGTGGAAATC]	DBF4B	1501-1510	2044-2053
		[TGTGGAAAAC]	SNORD63	2044-2053	1177-1186
		[TTCCGAAACC]	ZNF75A	1177-1186	141-150
		[TTAGGAAACC]	LOC100128398	141-150

## Sheet: ZNF205
Transcription factor	Sequence logo of the PWM	Sequence	Target gene	Putative transcription factor binding sites
ZNF205		[TAAAATG]	PHACTR2	234-240	290-296	1472-1478
		[AAAAATG]	PDE4D	146-152	682-688	797-803	849-855	929-935	1600-1606	1675-1681
		[GAAAATG]	CUX2	157-163	800-806	1514-1520
		[CGAAATG]	CROT	551-557	1125-1131	1151-1157	1189-1195	1619-1625
		[CAAAATG]	BNIP3L	136-142	1512-1518	2185-2191
		[AAAAATG]	PVT1	130-136	77-83
		[CAGAATG]	DISC1	77-83	1623-1629
		[AAAAATG]	PHF8	1623-1629	113-119
		[GAAAATG]	MDH1B	113-119	382-388	451-457	765-771
		[TAAAATG]	ODF2L	543-549	1862-1868
		[CAAAATG]	PTPRK	348-354	978-984	1149-1155
		[CAAAATG]	HLAA	310-316	338-344
		[GAAAATG]	GOLGA8A	449-455	133-139
		[CAATATG]	MGA	133-139	534-540
		[AAAAATG]	GPR20	190-196	982-988
		[AAAAATG]	DMTF1	982-988	1013-1019	1058-1064	1304-1310
		[CAATATG]	PGAP1	496-502	1788-1794	2157-2163
		[CAAAATG]	GSG1	24-30	216-222
		[GAAAATG]	CELSR1	112-118	1083-1089
		[CAGAATG]	CTSZ	1225-1231	483-489
		[CAAAATG]	L2HGDH	483-489	1054-1060
		[AAAAATG]	MID1	279-285	1032-1038	1825-1831	1846-1852
		[GAAAATG]	PPP3R1	240-246	704-710	814-820	976-982
		[AAAAATG]	RREB1	415-421	53-59
		[TAAAATG]	PHF20L1	53-59	686-692
		[GAAAATG]	NFKBIZ	686-692	754-760	857-863
		[CAGAATG]	FRMD4A	396-402	574-580	1740-1746
		[GAAAATG]	PCDHGA12	758-764	770-776	779-785
		[CAGAATG]	LINC01004	940-946	2023-2029
		[AAAAATG]	GOLGA8IP	282-288	599-605	1616-1622
		[TAAAATG]	LINC00265	295-301	1583-1589
		[CAGAATG]	AMZ1	70-76	756-762
		[AAAAATG]	HERC2	756-762	196-202
		[TAAAATG]	NAA35	196-202	203-209
		[TAAAATG]	PKN2	203-209	192-198
		[CAAAATG]	LINC00173	192-198	745-751
		[GAAAATG]	ZSCAN20	949-955	733-739
		[CAGAATG]	FHL2	733-739	1034-1040	1757-1763	1765-1771
		[TAAAATG]	ARHGAP24	641-647	1594-1600
		[CAGAATG]	VAC14	150-156	248-254	464-470
		[CAAAATG]	NBPF9	1688-1694	688-694
		[AAAAATG]	WTAP	688-694	13-19
		[TAAAATG]	SNX29	13-19	665-671
		[GAAAATG]	SMG1	665-671	1336-1342	1887-1893	2157-2163
		[AAAAATG]	ATXN2L	332-338	953-959
		[GAAAATG]	NBPF12	1720-1726	1960-1966
		[AAAAATG]	CSRNP3	433-439	559-565	1425-1431	1575-1581	1620-1626
		[CAATATG]	MTMR9LP	892-898	1070-1076
		[CAGAATG]	DOCK3	947-953	1333-1339
		[CGAAATG]	SLMAP	290-296	641-647
		[CAAAATG]	INADL	1342-1348	234-240
		[CAGAATG]	POGZ	234-240	1417-1423	1738-1744
		[CAGAATG]	FAM219A	1233-1239	232-238
		[CAAAATG]	LINC00999	232-238	1097-1103
		[GAAAATG]	MGEA5	1097-1103	1173-1179
		[CAATATG]	NEBL	941-947	1877-1883	2123-2129
		[TAAAATG]	STARD13	551-557	351-357
		[TAAAATG]	PCID2	351-357	1602-1608
		[AAAAATG]	PCNXL4	100-106	1928-1934
		[TAAAATG]	C5orf58	1553-1559	458-464
		[AAAAATG]	RPS16P5	458-464	555-561	874-880	1420-1426
		[GAAAATG]	LINC00240	373-379	1021-1027
		[TAAAATG]	PDE7A	337-343	1500-1506	1538-1544	1666-1672	1684-1690
		[CAAAATG]	DDX17	226-232	1821-1827
		[GAAAATG]	ZNF248	853-859	440-446
		[AAAAATG]	NCK2	440-446	1209-1215	1256-1262
		[TAAAATG]	HECTD4	763-769	301-307
		[TAAAATG]	ANKRD36B	301-307	992-998	1578-1584	1949-1955
		[CAGAATG]	RBM14	1684-1690	2136-2142
		[CAGAATG]	MCOLN3	319-325	865-871
		[GAAAATG]	ANKRD36	865-871	201-207
		[CAAAATG]	RNGTT	201-207	1068-1074
		[CAATATG]	KLF17	478-484	804-810	1766-1772	1808-1814	2146-2152
		[AAAAATG]	SMA4	1170-1176	267-273
		[CAGAATG]	PTGR1	267-273	929-935	1086-1092
		[AAAAATG]	CFAP44	155-161	161-167	1438-1444
		[CGAAATG]	SLC26A5	1534-1540	208-214
		[AAAAATG]	TRIP12	208-214	1446-1452
		[CAAAATG]	RBM33	1446-1452	191-197
		[CAGAATG]	LINC00665	191-197	533-539	1745-1751
		[TAAAATG]	KIAA1211	350-356	215-221
		[CAAAATG]	RAD51AS1	215-221	1590-1596
		[GAAAATG]	MALAT1	1590-1596	1318-1324
		[AAAAATG]	PHLDB3	1318-1324	185-191
		[GAAAATG]	ASAP1IT1	185-191	424-430	437-443	685-691	1166-1172
		[AAAAATG]	PRPF40A	1056-1062	2148-2154
		[GAAAATG]	AGAP9	1013-1019	87-93
		[GAAAATG]	NUTM2F	87-93	275-281	1078-1084	1228-1234	1243-1249	1801-1807	1855-1861
		[TAAAATG]	NBEAL1	624-630	843-849	1927-1933
		[CAAAATG]	SGOL2	746-752	1225-1231	1478-1484	1580-1586
		[GAAAATG]	AHSA2	1143-1149	1449-1455
		[GAAAATG]	MSTO1	1441-1447	113-119
		[GAAAATG]	LINC00597	113-119	188-194
		[AAAAATG]	PFN1P2	204-210	829-835	1221-1227
		[TAAAATG]	FBXL17	2039-2045	456-462
		[AAAAATG]	SND1IT1	456-462	1617-1623
		[GAAAATG]	HYMAI	830-836	1366-1372
		[AAAAATG]	CECR2	988-994	368-374
		[AAAAATG]	EBLN2	368-374	696-702	794-800	1298-1304	1362-1368
		[AAAAATG]	EID3	417-423	117-123
		[TAAAATG]	CATSPER2	117-123	126-132	1524-1530
		[AAAAATG]	KRTAP33	582-588	830-836	962-968	1387-1393	1821-1827
		[CAGAATG]	GHRLOS	17-23	385-391
		[AAAAATG]	FAM106A	1948-1954	31-37
		[CAAAATG]	RPS15AP10	31-37	996-1002
		[GAAAATG]	RABGAP1L	996-1002	1193-1199
		[AAAAATG]	SCARNA4	1455-1461	173-179
		[AAAAATG]	STAU2AS1	173-179	885-891
		[CAATATG]	SNORD11	568-574	595-601
		[TAAAATG]	TAS2R43	1631-1637	1698-1704	1717-1723	1800-1806
		[CAATATG]	TAS2R19	929-935	1891-1897
		[CGAAATG]	SNORA81	1287-1293	1496-1502	1506-1512	2194-2200
		[AAAAATG]	RNU4ATAC	182-188	513-519	1022-1028	2125-2131
		[AAAAATG]	SCARNA23	1182-1188	676-682
		[AAAAATG]	SNORA74B	676-682	1081-1087	1450-1456	1565-1571
		[CAAAATG]	SNORD11B	15-21	609-615	1300-1306
		[CAAAATG]	CEP68	1683-1689	1766-1772
		[GAAAATG]	SNORD19	802-808	524-530
		[AAAAATG]	MIR181A1HG	524-530	1400-1406	1513-1519	1898-1904
		[GAAAATG]	BMS1P6	1053-1059	109-115
		[CAGAATG]	RNF207	109-115	308-314
		[CAAAATG]	LINC01347	662-668	13-19
		[AAAAATG]	SNORD12C	13-19	227-233	2180-2186
		[CAATATG]	MTRNR2L7	1866-1872	2058-2064
		[TAAAATG]	ARL17A	2058-2064	948-954
		[AAAAATG]	ANKRD20A9P	948-954	1606-1612	2047-2053
		[TAAAATG]	WNK1	75-81	217-223
		[TAAAATG]	PIKFYVE	217-223	271-277
		[CAATATG]	DENND1B	271-277	1134-1140	1220-1226
		[CAGAATG]	CCDC144A	1358-1364	415-421
		[AAAAATG]	SNORA6	415-421	853-859	1749-1755
		[CAGAATG]	FAM212A	1221-1227	380-386
		[GAAAATG]	STK17B	380-386	983-989
		[CAAAATG]	KIDINS220	1410-1416	1950-1956
		[CAGAATG]	TLE4	1950-1956	949-955
		[AAAAATG]	SNX3	949-955	391-397
		[AAAAATG]	LINC00632	391-397	1619-1625
		[CAATATG]	IDS	1473-1479	247-253
		[CAGAATG]	BACH2	247-253	432-438
		[AAAAATG]	STAG2	224-230	586-592
		[AAAAATG]	SNORD98	1128-1134	2097-2103
		[GAAAATG]	USP45	2017-10-04	414-420	1107-1113	1304-1310
		[AAAAATG]	ZNF331	2172-2178	491-497
		[TAAAATG]	DOCK9	491-497	850-856	1396-1402	1453-1459
		[CAGAATG]	SMG7	624-630	1841-1847
		[CAGAATG]	SF1	1841-1847	293-299
		[CAATATG]	C17orf104	293-299	1368-1374
		[CAAAATG]	ZMYM2	1368-1374	1429-1435
		[CAAAATG]	HERC2P10	1429-1435	1480-1486	1788-1794
		[AAAAATG]	ZFAT	373-379	763-769	1177-1183	1625-1631
		[CAAAATG]	JPX	321-327	210-216
		[TAAAATG]	SCARNA9	210-216	358-364	988-994	1679-1685
		[AAAAATG]	CA5B	216-222	544-550
		[GAAAATG]	DNAH14	113-119	614-620	730-736	1125-1131	1277-1283
		[CAAAATG]	FAM160B1	2015-09-01	1415-1421	1814-1820
		[AAAAATG]	TSIX	225-231	1356-1362	2002-2008
		[CAAAATG]	PRDX4	1442-1448	1653-1659
		[AAAAATG]	PSMD10	194-200	212-218	266-272	348-354	574-580	741-747	1312-1318
		[AAAAATG]	DBF4B	1708-1714	308-314
		[AAAAATG]	DENND3	308-314	716-722
		[GAAAATG]	SNORD91B	716-722	2023-2029
		[GAAAATG]	SNORD19B	918-924	1210-1216	1442-1448
		[CAAAATG]	ZNF75A	1665-1671	98-104
		[TAAAATG]	LOC100288069	98-104	798-804
		[GAAAATG]	LOC100190986	767-773	856-862	1101-1107
		[AAAAATG]	LOC100128398	824-830	1214-1220	2192-2198
		[GAAAATG]	LOC100132356	40-46	737-743
		[GAAAATG]	LOC100129917	2017-07-01	80-86
		[CAAAATG]	LOC100131564	80-86	520-526
		[AAAAATG]	LOC284581	520-526	554-560	560-566	1154-1160	1698-1704	2183-2189
